# Supplementary material for: Circ_0004354 might compete with circ_0040039 to induce NPCs death and inflammatory response by targeting miR‐345‐3p‐FAF1/TP73 axis in intervertebral disc degeneration
Source: Hindawi journal article supplement (doi:10.1155/2022/2776440), 2022-01-01
Supplement: f2 [file 2776440.f2.pdf]

**Supplementary Table 2 The qRT-PCR primers used in this study.**

| <b>Gene</b>  | <b>Forward primer (5'-3')</b>                             | <b>Reverse primer(5'-3')</b>       |
|--------------|-----------------------------------------------------------|------------------------------------|
| circ_0040039 | CAAGGAAGTCTCTCTAGTCA                                      | TGCACCTTCCCACGGCAGAT               |
| circ_0004354 | TTCAGGATATCGTTGGTTCATTCTGGCTC                             | TACCTCCGCGGCTAGAGAGACTTCC          |
| FAF1         | ACCAACGTGTTCTGCTCACA                                      | AGTCCGAATGGTTTGTGCCA               |
| TP73         | CCTCCCAAGGGTTACAGAGC                                      | CCAGATGGTCATGCGGTACT               |
| ACAN         | TGTAACCCAGGCTCCAAC                                        | GCAGCCCACTTAGGTCC                  |
| COL2         | GCCTGAAGGGACACCG                                          | CCAGGGATTCCATTAGCAC                |
| IL-1 $\beta$ | CGCCAGTGAAATGATGGCTTA                                     | GTGGTGGTCGGAGATTTCGTAG             |
| GAPDH        | AGAAGGCTGGGGCTCATTG                                       | GCAGGAGGCATTGCTGATGAT              |
| U6           | CTCGCTTCGGCAGCACA                                         | AACGCTTCACGAATTTGCGT               |
| miR-345-3p   | GTCGTATCCAGTGCAGGGTCCGAGGT<br>ATTCGCACTGGATACGACCctccagac | ATGGTTTCGTGGGgcccctgaacgaggggtctgg |
| miR-345-3p   | Com R: GTGCAGGGTCCGAGGT                                   |                                    |
