# Supplementary material for: Circ_0004354 might compete with circ_0040039 to induce NPCs death and inflammatory response by targeting miR‐345‐3p‐FAF1/TP73 axis in intervertebral disc degeneration
Source: Hindawi journal article supplement (doi:10.1155/2022/2776440), 2022-01-01
Supplement: f3 [file 2776440.f3.pdf]

**Supplementary Table 3 Antibody for western blotting and RIP**

| <b>Antibody</b> | <b>Company</b>  | <b>Cat No.</b> | <b>Dilution</b> | <b>Description</b>           |
|-----------------|-----------------|----------------|-----------------|------------------------------|
| FAF1            | Abcam           | ab183045       | 1:50000         | Rabbit monoclonal (EPR14754) |
| TP73            | Abcam           | ab215038       | 1:1000          | Rabbit monoclonal (EPR19884) |
| ACAN            | Abcam           | ab3778         | 1:200           | Mouse monoclonal (6-B-4)     |
| COL2            | Abcam           | ab188570       | 1:5000          | Rabbit monoclonal (EPR12268) |
| IL-1 $\beta$    | Abcam           | ab9722         | 1:1000          | Rabbit polyclonal            |
| P21             | Abcam           | ab109520       | 1:2000          | Rabbit monoclonal [EPR362]   |
| BAX             | Abcam           | ab32503        | 1:2000          | Rabbit monoclonal [E63]      |
| CASP3           | Abcam           | ab32351        | 1:5000          | Rabbit monoclonal (E87)      |
| AGO2            | Abcam           | ab32381        | 1:1000          | Rabbit polyclonal            |
| IgG             | Sino Biological | CR1            | 1:1000          | Rabbit polyclonal            |
| GSDME           | Abcam           | ab215191       | 1:1000          | Rabbit monoclonal (EPR19859) |
| GAPDH           | Proteintech     | 10494-1-ap     | 1:20000         | Rabbit                       |
| $\beta$ -actin  | Proteintech     | 66009-1-1g     | 1:10000         | Rabbit                       |
