# Supplementary material for: Circ_0004354 might compete with circ_0040039 to induce NPCs death and inflammatory response by targeting miR‐345‐3p‐FAF1/TP73 axis in intervertebral disc degeneration
Source: Hindawi journal article supplement (doi:10.1155/2022/2776440), 2022-01-01

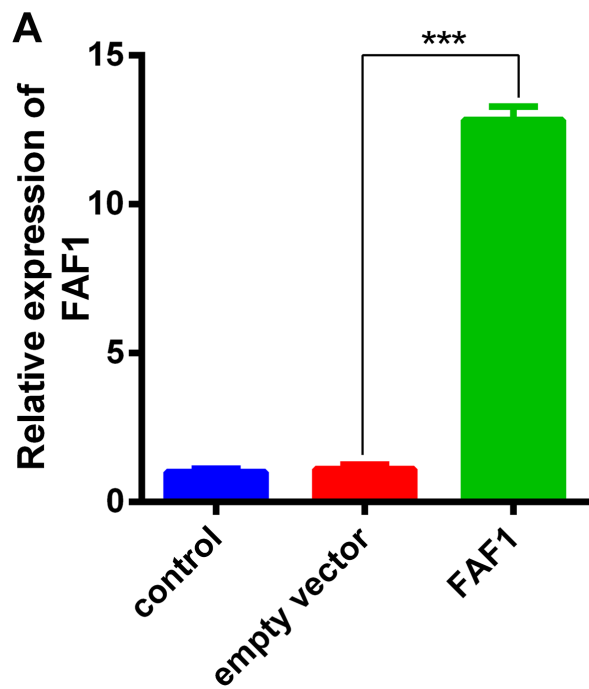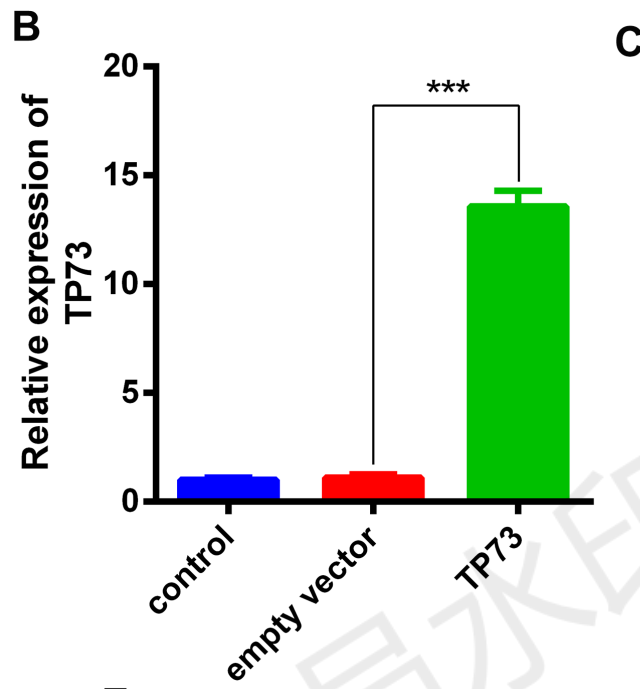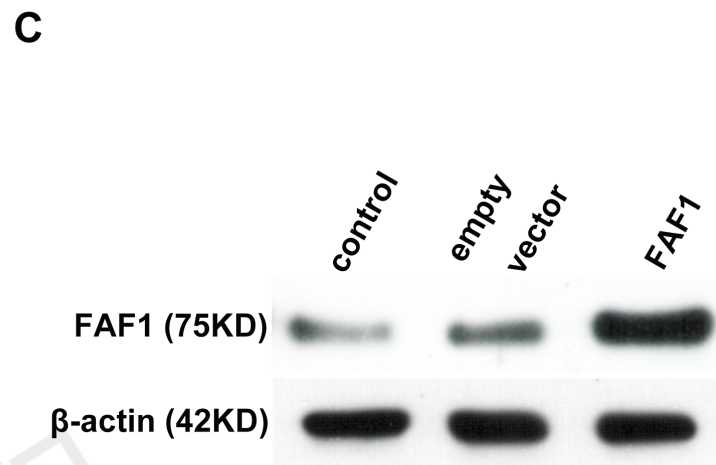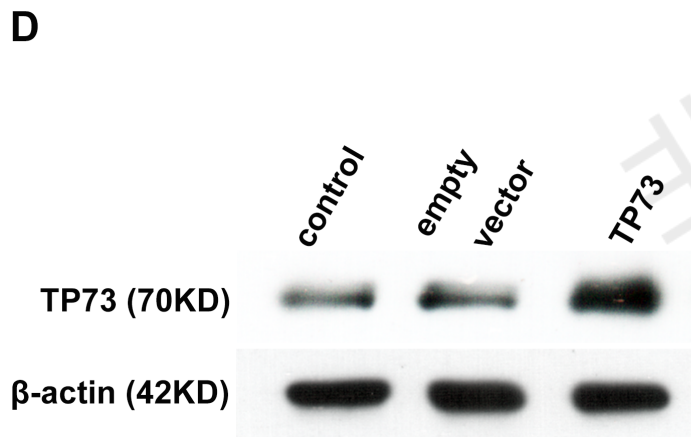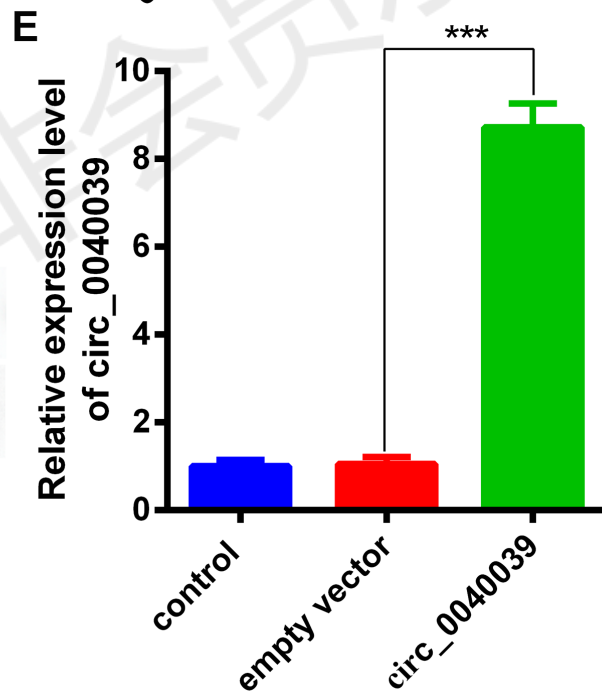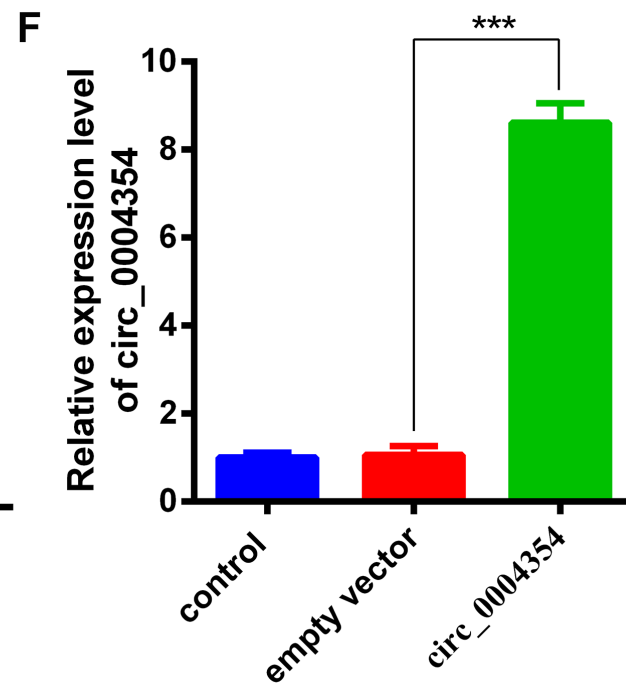

Supplement: f6 [file 2776440.f6.pdf]
